# Supplementary material for: Performance of prediction models for nephropathy in people with type 2 diabetes: systematic review and external validation study
Source: PubMed Central journal article supplement — BMJ. 2021 Sep 28;374:n2134. doi: 10.1136/bmj.n2134 (PMC8477272; doi:10.1136/bmj.n2134), 2021-09-28
Supplement: slir065723.wf1.pdf [file slir065723.wf1.pdf]

## SUPPLEMENTAL FIGURES

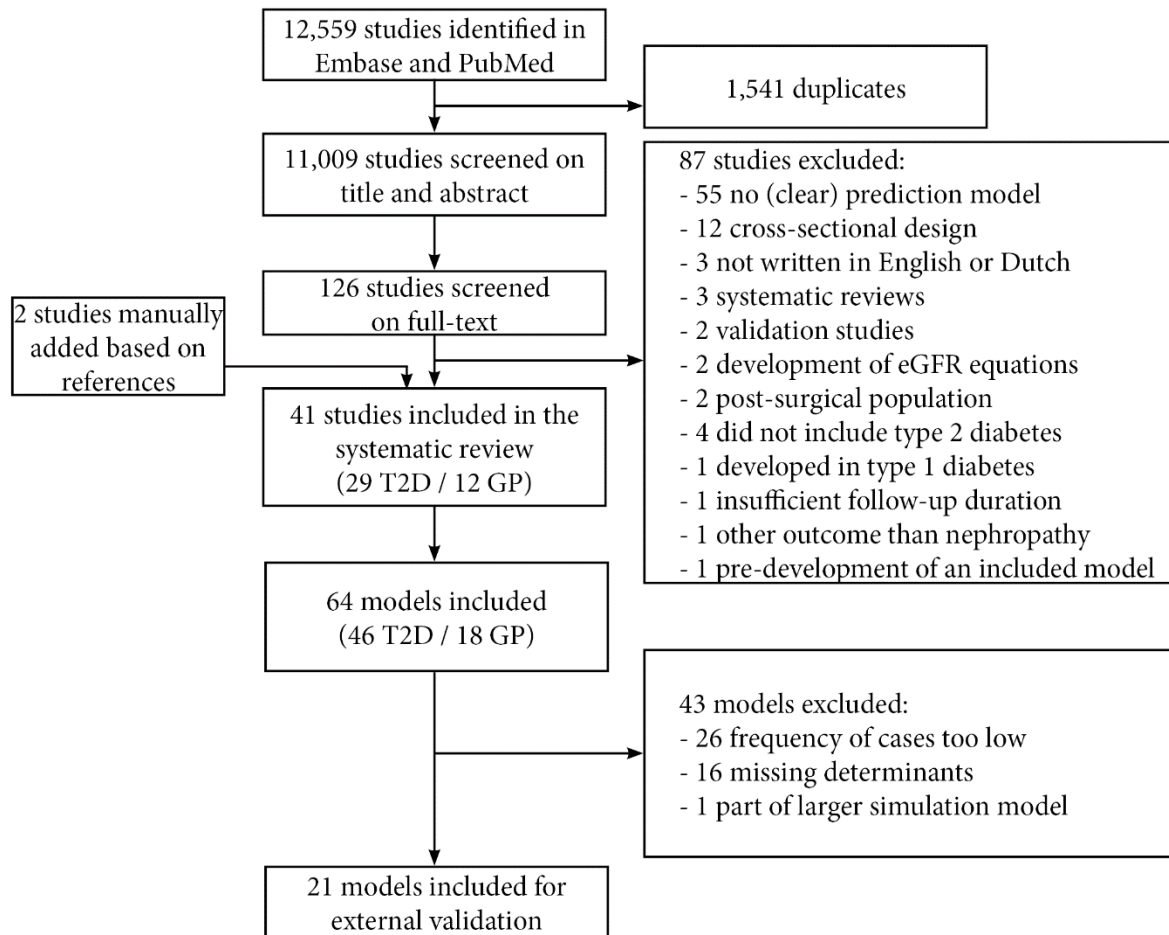

**Figure S1. Flow chart of included studies in the systematic review and external validation.**

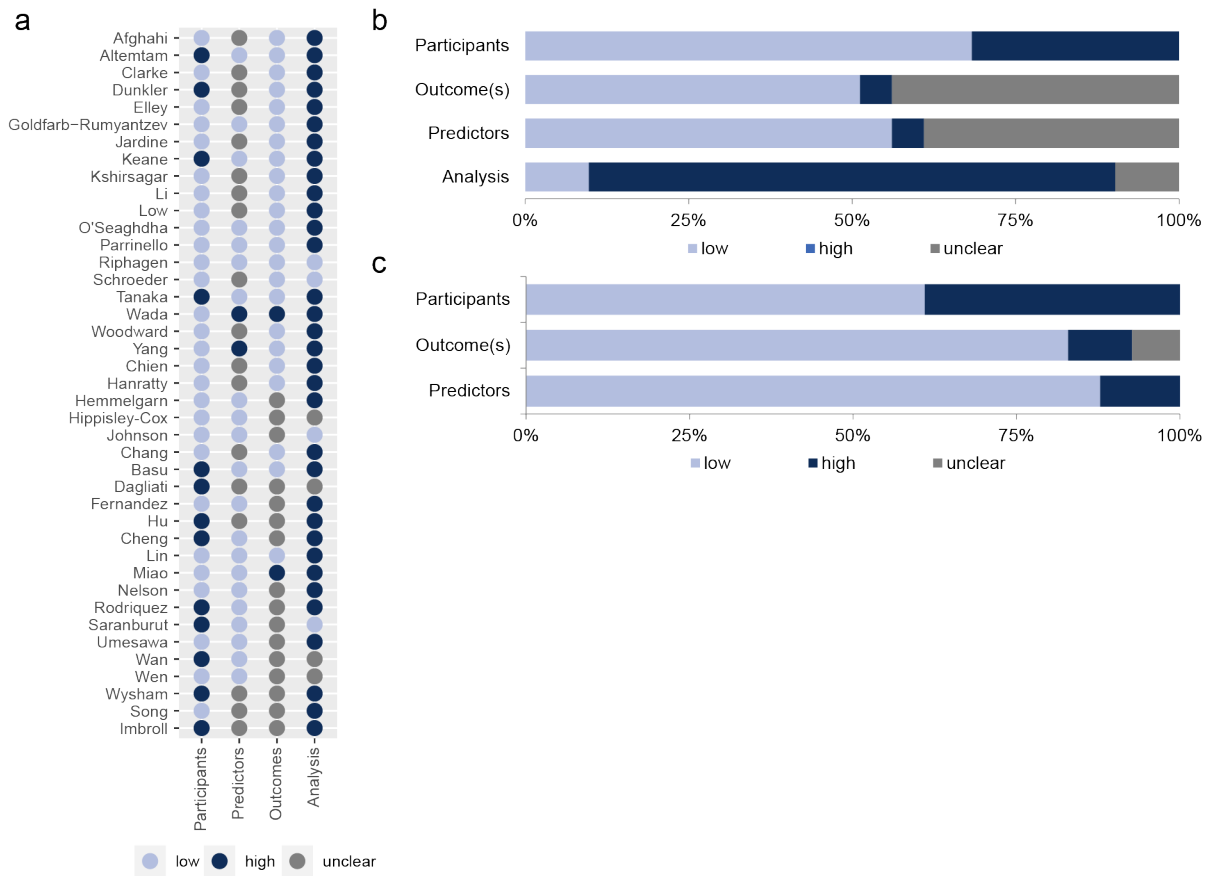

**Figure S2 Risk of bias.** **a** Risk of bias for each study on the participant, predictors, outcome and analysis level. **b** Summary of the risk of bias. **c** Concerns for applicability of the prediction models.

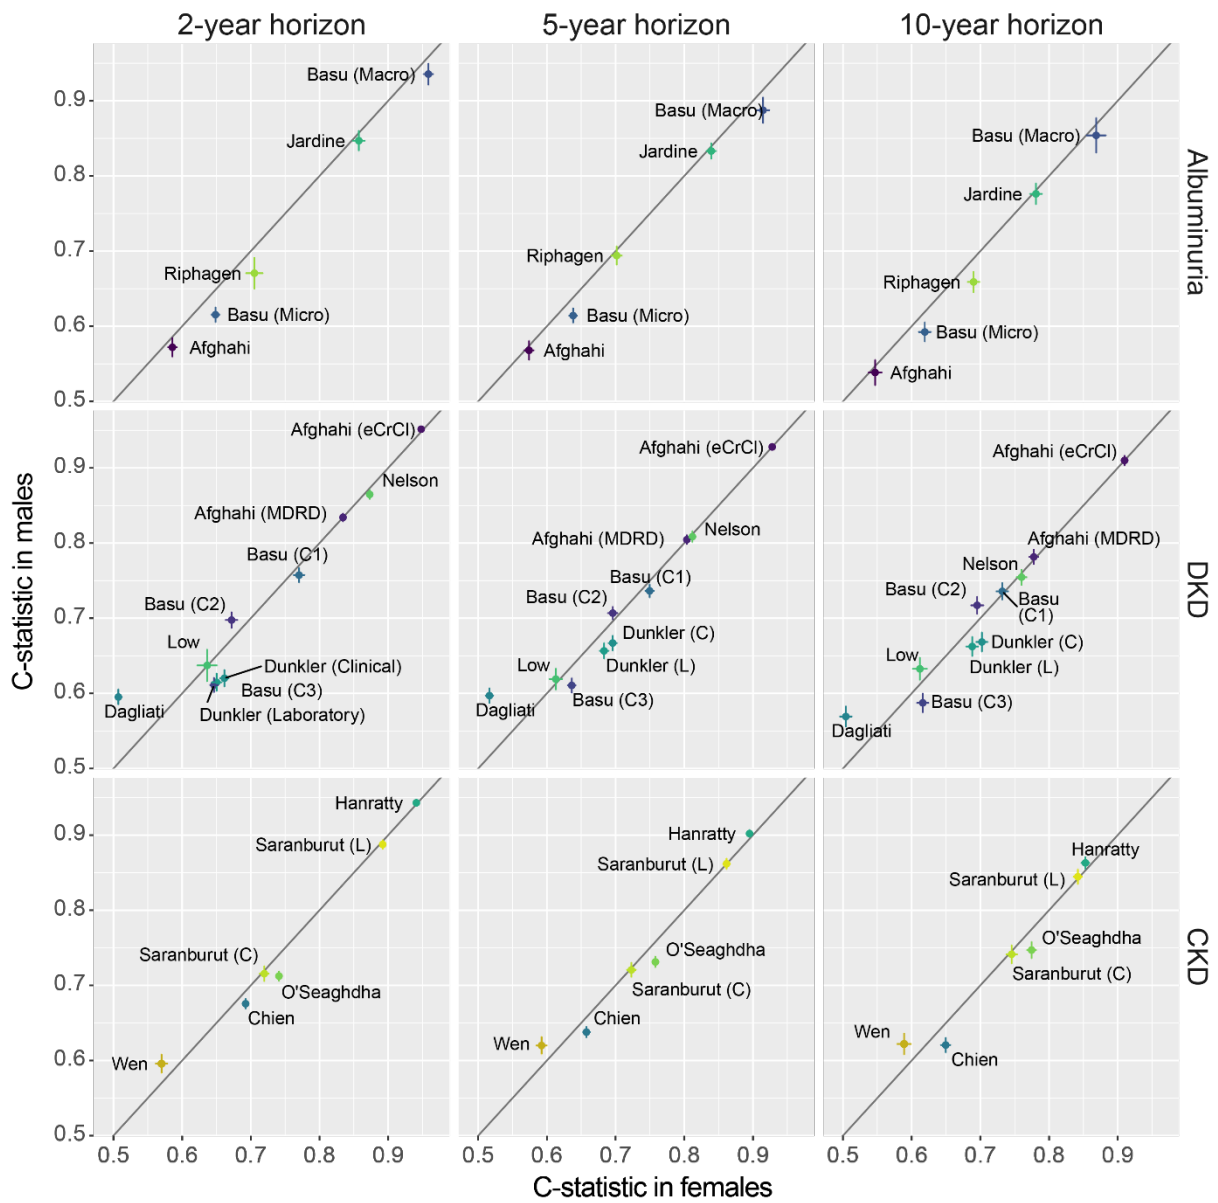

**Figure S3 Comparison of C-statistics between females and males.** X-axis, c-statistics of models in females, y-axis c-statistics of models in males. Columns, investigated horizons.

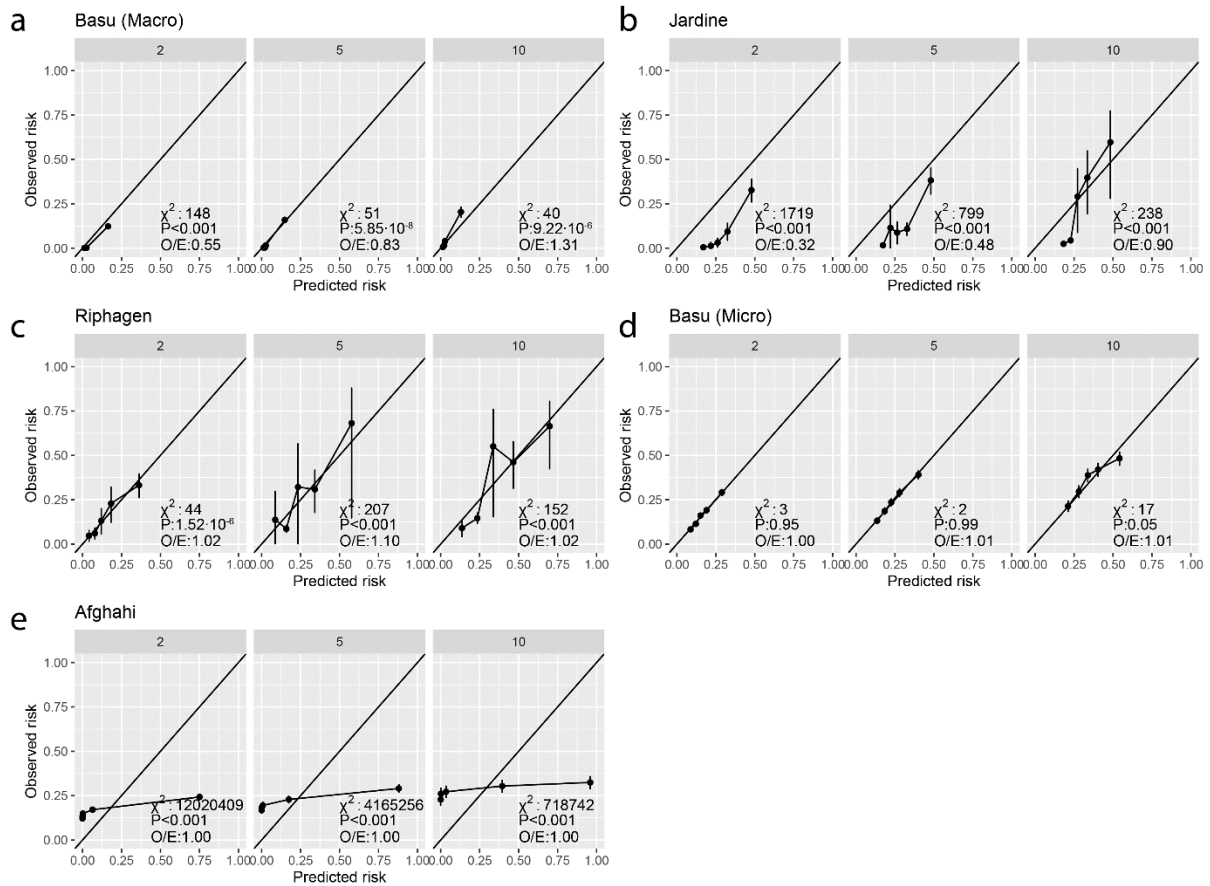

**Figure S4 Calibration plots for the albuminuria models developed in people with diabetes.** Models include those of Basu macroalbuminuria (a), Jardine (b), Riphagen (c), Basu microalbuminuria (d), and Afghani (e). X-axis predicted risk, y-axis observed risk in DCS. Black diagonal represents the  $x=y$  line.

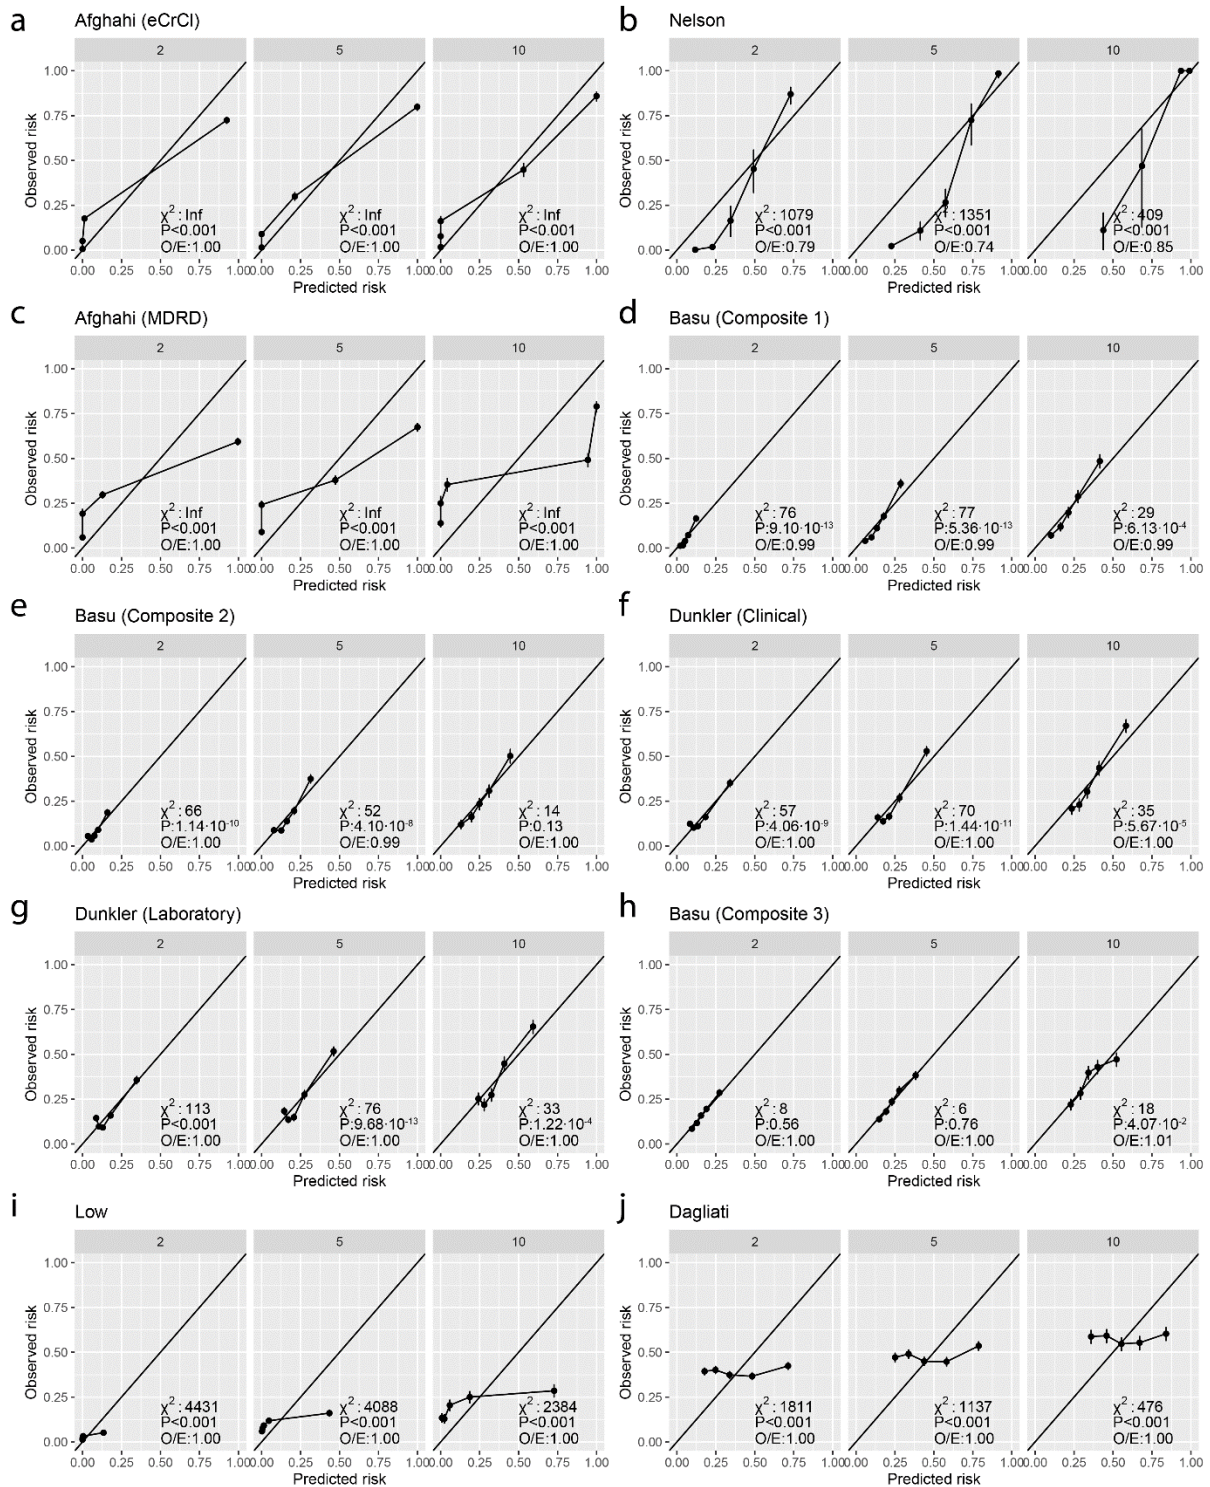

**Figure S5 Calibration plots for the renal decline and CKD models developed in people with diabetes.** Models include those of Afghahi eCrCl (a), Nelson (b), Afghahi MDRD (c), Basu composite 1 (d), Basu composite 2 (e), Dunkler clinical (f), Dunkler laboratory (g), Basu composite 3 (h), Low (i), Dagliati (j). In Basu et al composite outcomes were used. Composite 1, doubling serum creatinine or  $>20 \text{ mL/min/1.73m}^2$  decrease in eGFR; composite 2, macro-albuminuria, renal failure, end stage renal disease, doubling of serum creatinine or  $>20 \text{ mL/min/1.73m}^2$  decrease in eGFR; Composite 3, Macroalbuminuria, microalbuminuria, renal failure, or end-stage renal disease. CKD,

chronic kidney disease; ESRD, end-stage renal disease. X-axis predicted risk, y-axis observed risk in DCS. Black diagonal represents the  $x=y$  line.

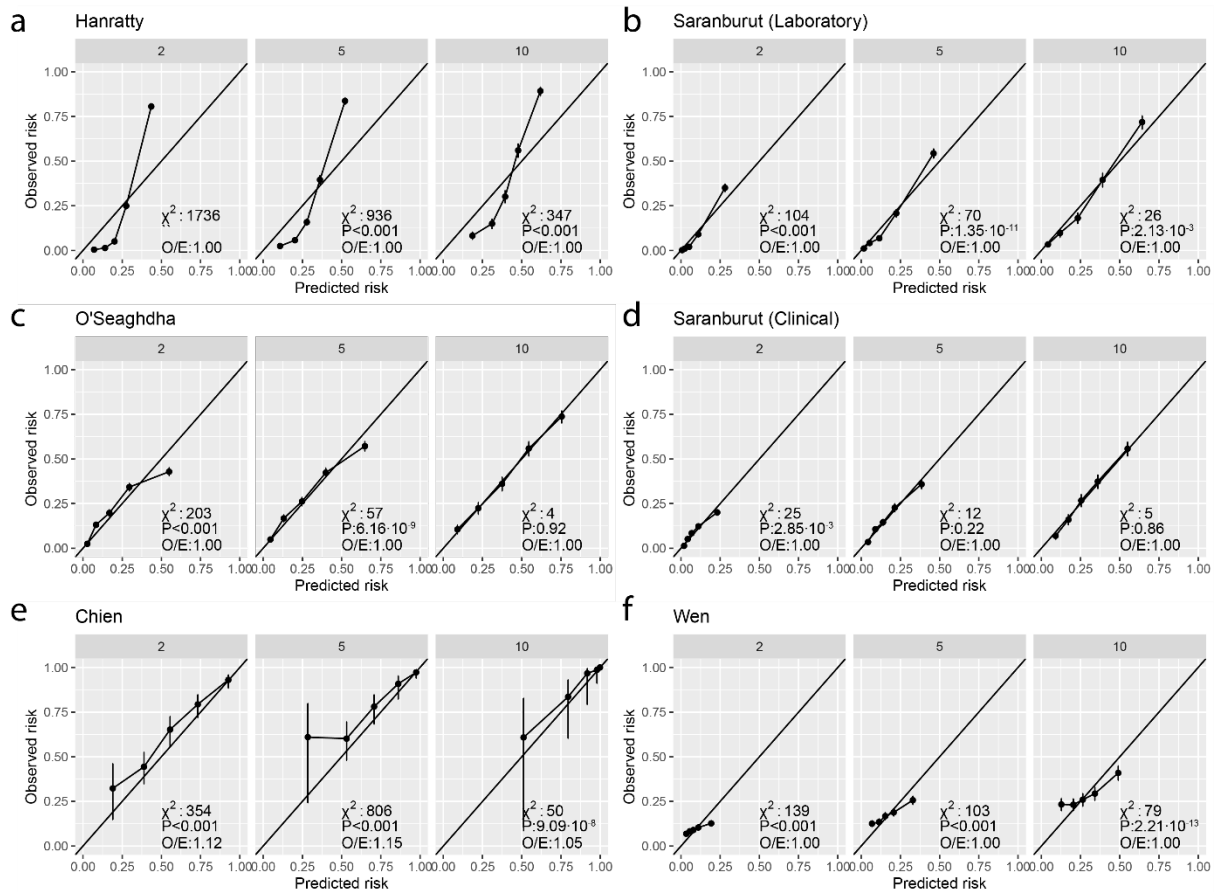

**Figure S6 Calibration plots for the renal decline and CKD models developed in the general population.** Models include those of Saranburut laboratory (a), Hanratty (b), O'Seaghda (c), Saranburut clinical (d), Wen (e), Chien (f). X-axis predicted risk, y-axis observed risk in DCS. Black diagonal represents the x=y line.
