# Supplementary material for: Performance of prediction models for nephropathy in people with type 2 diabetes: systematic review and external validation study
Source: PubMed Central journal article supplement — BMJ. 2021 Sep 28;374:n2134. doi: 10.1136/bmj.n2134 (PMC8477272; doi:10.1136/bmj.n2134), 2021-09-28
Supplement: slir065723.wt1.pdf [file slir065723.wt1.pdf]

**Table S1. TRIPOD Checklist for Prediction Model Validation.**

| Section/Topic                | Item | Checklist Item                                                                                                                                                                                        | Page                 |
|------------------------------|------|-------------------------------------------------------------------------------------------------------------------------------------------------------------------------------------------------------|----------------------|
| <b>Title and abstract</b>    |      |                                                                                                                                                                                                       |                      |
| Title                        | 1    | Identify the study as developing and/or validating a multivariable prediction model, the target population, and the outcome to be predicted.                                                          | 1                    |
| Abstract                     | 2    | Provide a summary of objectives, study design, setting, participants, sample size, predictors, outcome, statistical analysis, results, and conclusions.                                               | 2                    |
| <b>Introduction</b>          |      |                                                                                                                                                                                                       |                      |
| Background and objectives    | 3a   | Explain the medical context (including whether diagnostic or prognostic) and rationale for developing or validating the multivariable prediction model, including references to existing models.      | 4                    |
|                              | 3b   | Specify the objectives, including whether the study describes the development or validation of the model or both.                                                                                     | 4                    |
| <b>Methods</b>               |      |                                                                                                                                                                                                       |                      |
| Source of data               | 4a   | Describe the study design or source of data (e.g., randomized trial, cohort, or registry data), separately for the development and validation data sets, if applicable.                               | 6                    |
|                              | 4b   | Specify the key study dates, including start of accrual; end of accrual; and, if applicable, end of follow-up.                                                                                        | 6                    |
| Participants                 | 5a   | Specify key elements of the study setting (e.g., primary care, secondary care, general population) including number and location of centres.                                                          | 6-8                  |
|                              | 5b   | Describe eligibility criteria for participants.                                                                                                                                                       | 7                    |
|                              | 5c   | Give details of treatments received, if relevant.                                                                                                                                                     |                      |
| Outcome                      | 6a   | Clearly define the outcome that is predicted by the prediction model, including how and when assessed.                                                                                                | 7-8                  |
|                              | 6b   | Report any actions to blind assessment of the outcome to be predicted.                                                                                                                                |                      |
| Predictors                   | 7a   | Clearly define all predictors used in developing or validating the multivariable prediction model, including how and when they were measured.                                                         | 7                    |
|                              | 7b   | Report any actions to blind assessment of predictors for the outcome and other predictors.                                                                                                            |                      |
| Sample size                  | 8    | Explain how the study size was arrived at.                                                                                                                                                            | 7                    |
| Missing data                 | 9    | Describe how missing data were handled (e.g., complete-case analysis, single imputation, multiple imputation) with details of any imputation method.                                                  | 7-8                  |
| Statistical analysis methods | 10c  | For validation, describe how the predictions were calculated.                                                                                                                                         | 7-8                  |
|                              | 10d  | Specify all measures used to assess model performance and, if relevant, to compare multiple models.                                                                                                   | 8                    |
|                              | 10e  | Describe any model updating (e.g., recalibration) arising from the validation, if done.                                                                                                               | 8                    |
| Risk groups                  | 11   | Provide details on how risk groups were created, if done.                                                                                                                                             | 8                    |
| Development vs. validation   | 12   | For validation, identify any differences from the development data in setting, eligibility criteria, outcome, and predictors.                                                                         | Supplementary tables |
| <b>Results</b>               |      |                                                                                                                                                                                                       |                      |
| Participants                 | 13a  | Describe the flow of participants through the study, including the number of participants with and without the outcome and, if applicable, a summary of the follow-up time. A diagram may be helpful. | 10                   |
|                              | 13b  | Describe the characteristics of the participants (basic demographics, clinical features, available predictors), including the number of participants with missing data for predictors and outcome.    | 8, Table 1           |
|                              | 13c  | For validation, show a comparison with the development data of the distribution of important variables (demographics, predictors and outcome).                                                        |                      |
| Model performance            | 16   | Report performance measures (with CIs) for the prediction model.                                                                                                                                      | Fig.2                |
| Model-updating               | 17   | If done, report the results from any model updating (i.e., model specification, model performance).                                                                                                   | Fig.2                |
| <b>Discussion</b>            |      |                                                                                                                                                                                                       |                      |
| Limitations                  | 18   | Discuss any limitations of the study (such as nonrepresentative sample, few events per predictor, missing data).                                                                                      | 13-14                |
| Interpretation               | 19a  | For validation, discuss the results with reference to performance in the development data, and any other validation data.                                                                             | 12-13                |
|                              | 19b  | Give an overall interpretation of the results, considering objectives, limitations, results from similar studies, and other relevant evidence.                                                        | 13                   |

|                           |    |                                                                                                                               |                 |
|---------------------------|----|-------------------------------------------------------------------------------------------------------------------------------|-----------------|
| Implications              | 20 | Discuss the potential clinical use of the model and implications for future research.                                         | 13-14           |
| <b>Other information</b>  |    |                                                                                                                               |                 |
| Supplementary information | 21 | Provide information about the availability of supplementary resources, such as study protocol, Web calculator, and data sets. | S<br>Table<br>s |
| Funding                   | 22 | Give the source of funding and the role of the funders for the present study.                                                 | 14              |

**Table S2: PICOTS items framing the review aim, search strategy, and study inclusion and exclusion criteria for the systematic review**

| <b>Item</b>           | <b>Description</b>                                                                                    |
|-----------------------|-------------------------------------------------------------------------------------------------------|
| Population            | People with type 2 diabetes or applicable to people with type 2 diabetes by including it as predictor |
| Intervention or Model | All prognostic models from discovery studies to predict risk of nephropathy                           |
| Comparator            | Not applicable                                                                                        |
| Outcome(s)            | Albuminuria, diabetic kidney disease, chronic kidney disease and end-stage renal                      |
| Timing                | At least 1 year follow-up                                                                             |
| Setting               | Applicable to people with type 2 diabetes treated in primary care                                     |

**Table S3 Search strings used for the systematic review.**

|                                                                                                                                                                                                                                                                                                                                                                                                                                                                                                                                                                                                                                                                                                                                                                                                                                                                                                                                                                                                                                                                                                                                                                                                                                                                                                                                                                                                                                                                                                                                                                               |
|-------------------------------------------------------------------------------------------------------------------------------------------------------------------------------------------------------------------------------------------------------------------------------------------------------------------------------------------------------------------------------------------------------------------------------------------------------------------------------------------------------------------------------------------------------------------------------------------------------------------------------------------------------------------------------------------------------------------------------------------------------------------------------------------------------------------------------------------------------------------------------------------------------------------------------------------------------------------------------------------------------------------------------------------------------------------------------------------------------------------------------------------------------------------------------------------------------------------------------------------------------------------------------------------------------------------------------------------------------------------------------------------------------------------------------------------------------------------------------------------------------------------------------------------------------------------------------|
| <p><b>PubMed</b></p> <p>"Diabetic Nephropathies"[Mesh] OR "Albuminuria"[Mesh] OR "Renal Insufficiency"[Mesh] OR nephropath*[tiab] OR albuminuria*[tiab] OR microalbuminuria*[tiab] OR macroalbuminuria*[tiab] OR kidney disease*[tiab] OR kidney disorder*[tiab] OR kidney failure*[tiab] OR kidney insufficien*[tiab] OR renal disorder*[tiab] OR renal failure*[tiab] OR renal insufficien*[tiab] AND "Diabetes Mellitus, Type 2"[Mesh] OR diabetes[tiab] OR (diabetic*[tiab] AND (non insulin depend*[tiab] OR noninsulin depend*[tiab] OR noninsulindepend*[tiab] OR non insulindepend*[tiab])) OR dm2[tiab] OR niddm[tiab] OR dm 2[tiab] OR t2d*[tiab] OR dm type 2[tiab] OR type 2 diabet*[tiab] OR type two diabet*[tiab] OR type II diabet*[tiab] OR dm type II[tiab] AND "Decision Support Techniques"[Mesh] OR "Prognosis"[Mesh] OR ((predict*[tiab] OR prognos*[tiab]) AND (model*[tiab] OR rule*[tiab] OR score*[tiab] OR tool[tiab])) OR risk score*[tiab] OR risk assessment*[tiab] OR risk algorithm*[tiab] OR risk engine*[tiab] OR risk equation*[tiab] OR risk prediction*[tiab] OR risk calculation*[tiab] NOT ("Animals"[Mesh] NOT "Humans"[Mesh])</p>                                                                                                                                                                                                                                                                                                                                                                                                    |
| <p><b>Embase</b></p> <p>'diabetic nephropathy'/exp OR 'albuminuria'/exp OR 'kidney failure'/de OR 'chronic kidney failure'/exp OR nephropath*:ab,ti OR albuminuria*:ab,ti OR microalbuminuria*:ab,ti OR macroalbuminuria*:ab,ti OR (kidney NEAR/3 disease*):ab,ti OR (kidney NEAR/3 disorder*):ab,ti OR (kidney NEAR/3 failure*):ab,ti OR (kidney NEAR/3 insufficien*):ab,ti OR 'renal disorder*':ab,ti OR 'renal failure*':ab,ti OR 'renal insufficien*':ab,ti AND 'non insulin dependent diabetes mellitus'/exp OR diabetes:ab,ti OR (diabetic* NEAR/3 ('non insulin depend*' OR 'noninsulin depend*' OR noninsulindepend* OR 'non insulindepend*')):ab,ti OR dm2:ab,ti OR niddm:ab,ti OR 'dm 2':ab,ti OR t2d*:ab,ti OR 'dm type 2':ab,ti OR 'type 2 diabet*':ab,ti OR 'type two diabet*':ab,ti OR 'type ii diabet*':ab,ti OR 'dm type ii':ab,ti AND 'decision support system'/exp OR 'prognosis'/de OR (predict* NEAR/3 model*):ab,ti OR (predict* NEAR/3 rule*):ab,ti OR (predict* NEAR/3 score*):ab,ti OR (predict* NEAR/3 tool*):ab,ti OR (prognos* NEAR/3 model*):ab,ti OR (prognos* NEAR/3 rule*):ab,ti OR (prognos* NEAR/3 score*):ab,ti OR (prognos* NEAR/3 tool*):ab,ti OR (risk NEAR/3 score*):ab,ti OR (risk NEAR/3 assessment*):ab,ti OR (risk NEAR/3 algorithm*):ab,ti OR (risk NEAR/3 engine*):ab,ti OR (risk NEAR/3 equation*):ab,ti OR (risk* NEAR/3 prediction*):ab,ti OR (risk NEAR/3 calculation*):ab,ti NOT ([animals]/lim NOT [humans]/lim) NOT ('conference abstract'/it OR 'conference review'/it OR 'editorial'/it OR 'letter'/it OR 'note'/it)</p> |

**Table S4.** Characteristics of prediction models for the risk of nephropathy developed in the type 2 diabetes population

| Study                      | Development population                    | Country        | Design   | Type of model        | Outcome                                                                                                                                   | n events/ n total | Predicted time (years) | Model            | Number of predictors | Discrimination (AUC)                | Calibration (Hosmer-Lemeshow p-value) | Method of internal validation |
|----------------------------|-------------------------------------------|----------------|----------|----------------------|-------------------------------------------------------------------------------------------------------------------------------------------|-------------------|------------------------|------------------|----------------------|-------------------------------------|---------------------------------------|-------------------------------|
| Afghahi 2011 <sup>1</sup>  | T2D                                       | Sweden         | Registry | Logistic             | Albuminuria (microalbuminuria urine albumin excretion 20-200 µg/min or macroalbuminuria > 200 µg/min)                                     | 729/3,667         | 5                      | -                | 8                    | 0.67-0.87                           | p-value = not significant             | N.R.                          |
| Afghahi 2011 <sup>1</sup>  | T2D                                       | Sweden         | Registry | Logistic             | Renal impairment (MDRD eGFR < 60 mL/min/1.73 m <sup>2</sup> )                                                                             | 407/3,667         | 5                      | -                | 6                    | 0.67-0.87                           | p-value = not significant             | N.R.                          |
| Afghahi 2011 <sup>1</sup>  | T2D                                       | Sweden         | Registry | Logistic             | Renal impairment (eCrCl < 60 mL/min)                                                                                                      | 407/3,667         | 5                      | -                | 6                    | 0.67-0.87                           | p-value = not significant             | N.R.                          |
| Altemtam 2012 <sup>2</sup> | T2D with kidney damage or CKD             | United Kingdom | Registry | Logistic             | Progression of diabetic kidney disease (> 2 mL/min decline in MDRD eGFR)                                                                  | 94/270            | 5                      | -                | 5                    | N.R.                                | N.R.                                  | N.R.                          |
| Basu 2017 <sup>3</sup>     | T2D                                       | USA            | Cohort   | Cox                  | Micro-albuminuria (UACR ≥ 30 mg/g)                                                                                                        | 1551/9635         | 4.7                    | -                | 14                   | 0.62                                | 0.77*                                 | External validation set       |
|                            |                                           |                |          |                      | Macro-albuminuria (UACR ≥ 300 mg/g)                                                                                                       | 627/9635          |                        |                  |                      | 0.84                                | <0.001*                               |                               |
|                            |                                           |                |          |                      | Renal failure or end-stage renal disease (Serum creatinine ≥ 3.3 mg/L)                                                                    | 292/9635          |                        |                  |                      | 0.60                                | <0.001*                               |                               |
|                            |                                           |                |          |                      | Doubling serum creatinine or >20 mL/min/1.73m <sup>2</sup> decrease in eGFR                                                               | 5910/9635         |                        |                  |                      | 0.76                                | <0.001*                               |                               |
|                            |                                           |                |          |                      | Macro-albuminuria, renal failure, end stage renal disease, doubling of serum creatinine or >20 mL/min/1.73m <sup>2</sup> decrease in eGFR | 6195/9635         |                        |                  |                      | 0.73                                | <0.001*                               |                               |
|                            |                                           |                |          |                      | Macroalbuminuria, microalbuminuria, renal failure, or end-stage renal disease                                                             | 2321/9635         |                        |                  |                      | 0.61                                | 0.87*                                 |                               |
| Cheng 2020 <sup>4</sup>    | T2D with CKD                              | China          | Cohort   | Logistic             | Kidney failure (Dialysis, renal transplantation)                                                                                          | 272/641           | 3                      | Clinical         | 3                    | 0.626                               | 0.315                                 | Discovery and validation set  |
|                            |                                           |                |          |                      |                                                                                                                                           |                   |                        | Laboratory       | 5                    | 0.986                               | 0.755                                 |                               |
|                            |                                           |                |          |                      |                                                                                                                                           |                   |                        | Lab-medication   | 6                    | 0.986                               | 0.438                                 |                               |
|                            |                                           |                |          |                      |                                                                                                                                           |                   |                        | Full             | 8                    | 0.986                               | 0.540                                 |                               |
| Clarke 2004 <sup>5</sup>   | T2D                                       | United Kingdom | RCT      | Weibull              | Renal failure (creatinine level > 250 µmol/l or death caused by renal failure)                                                            | 24/3,642          | N.R.                   | -                | 2                    | N.R.                                | N.R.                                  | N.R.                          |
| Dagliati 2018 <sup>6</sup> | T2D                                       | Italy          | Cohort   | Logistic             | Nephropathy (<60 mL/min/1.73m <sup>2</sup> or UACR≥30 mg/g)                                                                               | 121/943           | 3, 5, 7                | -                | 4                    | 3Y: 0.647<br>5Y: 0.693<br>7Y: 0.686 | N.R.                                  | Leave-one-out                 |
| Dunkler 2015 <sup>7</sup>  | T2D with vascular disease or organ damage | 40 countries   | RCT      | Multinomial logistic | CKD (UACR > 30 mg/g and 300 mg/g or doubling creatinine) or ESRD (CKD-EPI eGFR < 15 mL/min/1.73 m <sup>2</sup> )                          | 1,079/6,766       | 5.5                    | Laboratory model | 5                    | 0.68                                | Calibration slope = 0.98              | Bootstrap                     |
|                            |                                           |                |          |                      |                                                                                                                                           |                   |                        | Clinical model   | 14                   | 0.69                                | Calibration slope = 0.88 to 0.90      |                               |
| Elley 2013 <sup>8</sup>    | T2D                                       | New Zealand    | Registry | Cox                  | ESRD (RRT or death by CKD or ESRD)                                                                                                        | 637/25,736        | 5                      | -                | 10                   | 0.89                                | N.R.                                  | N.R.                          |

**Table S4.** Continued

| Study                                 | Development population | Country                                                    | Design | Type of model                | Outcome                                                                                                                                                      | n events/ n total                               | Predicted time (years) | Model | Number of predictors        | Discrimination (AUC)                            | Calibration (Hosmer-Lemeshow p-value) | Method of internal validation   |
|---------------------------------------|------------------------|------------------------------------------------------------|--------|------------------------------|--------------------------------------------------------------------------------------------------------------------------------------------------------------|-------------------------------------------------|------------------------|-------|-----------------------------|-------------------------------------------------|---------------------------------------|---------------------------------|
| Fernandez-Fernandez 2020              | T1D and T2D            | Spain                                                      | Cohort | Logistic                     | Rapid progression (>5 mL/min/1.73 m <sup>2</sup> /year)                                                                                                      | All: 48/261<br>Men: 33<br>Women: 15             | 2.5                    | -     | All: 5<br>Men: 6<br>Women:4 | All: 0.81<br>Men: 0.92<br>Women: 0.90           | N.R.                                  | N.R.                            |
| Goldfarb-Rumyantzev 2002 <sup>9</sup> | T2D                    | United States                                              | Cohort | Artificial neural network    | Renal insufficiency (GFR < 71 mL/min)                                                                                                                        | 40/86                                           | 4                      | -     | 13                          | 0.91                                            | N.R.                                  | Random split sample             |
| Hu 2020 <sup>10</sup>                 | T2D                    | China                                                      | Cohort | Logistic                     | Diabetic nephropathy (UACR ≥ 30 µg/mg)                                                                                                                       | 701/3489                                        | 4                      | -     | 8                           | 0.744                                           | Medium calibration                    | Bootstrap                       |
| Imbroli 2017 <sup>11</sup>            | T2D                    | Malta                                                      | Cohort |                              | Albuminuria progression (Normo to micro, micro to macro)                                                                                                     | 59/243                                          | 8                      | -     | 4                           | N.R.                                            | N.R.                                  | N.R.                            |
| Jardine 2012 <sup>12</sup>            | T2D                    | 20 countries                                               | RCT    | Cox                          | Major kidney event (doubling serum creatinine level to ≥ 200 µmol/l)                                                                                         | 166/11,140                                      | 5                      | -     | 7                           | 0.85                                            | 0.90                                  | Bootstrap                       |
| Jardine 2012 <sup>12</sup>            | T2D                    | 20 countries                                               | RCT    | Cox                          | New-onset albuminuria (UACR ≥ 30 µg/mg)                                                                                                                      | 2,715/7,377                                     | 5                      | -     | 8                           | 0.65                                            | 0.06                                  | Bootstrap                       |
| Keane 2006 <sup>13</sup>              | T2D and nephropathy    | Asia, Europe, Latin America, New Zealand and North America | RCT    | Cox                          | ESRD (RRT)                                                                                                                                                   | 341/1513                                        | N.R.                   | -     | 4                           | N.R.                                            | Calibration table                     | Naïve and jackknife             |
| Li 2016 <sup>14</sup>                 | T2D                    | Taiwan                                                     | Cohort | Cox                          | ESRD (dialysis)                                                                                                                                              | 22/604                                          | Variable               | -     | 4                           | All: 0.94<br>CKD Stage 3-5:0.91                 | N.R.                                  | Leave-one-out                   |
| Lin 2017 <sup>15</sup>                | T2D                    | Chinese                                                    | Cohort | Cox                          | ESRD (MDRD eGFR < 15 mL/min/1.73 m <sup>2</sup> or RRT)                                                                                                      | Derivation: 813/16,070<br>Validation: 402/8,034 | 3, 5 and 8 years       | -     | 11                          | 3 years: 0.90<br>5 years: 0.86<br>8 years: 0.81 | p > 0.05                              | Random split sample             |
| Low 2017 <sup>16</sup>                | T2D                    | Malaysia                                                   | Cohort | Logistic                     | CKD progression (worsening in MDRD eGFR category coupled with ≥ 25% reduction in eGFR from baseline)                                                         | 679/1,582                                       | 6                      | -     | 6                           | Training: 0.80<br>Test: 0.83                    | 0.93                                  | Random split sample             |
| Miao 2017 <sup>17</sup>               | T2D                    | China                                                      | Cohort | Cox                          | Diabetic nephropathy<br>Persistent albuminuria and diabetic retinopathy in absence other kidney or urinary tract diseases                                    | Training: 45/5,705<br>Validation: 32/6,066      | 20                     | -     | Women: 6<br>Men: 8          | Women: 0.84<br>Men: 0.80                        | Calibration plot                      | Split sample                    |
| Nelson 2019 <sup>18</sup>             | T2D                    | Multinational                                              | Cohort | Multivariable competing risk | CKD (CKD-EPI eGFR < 60 mL/min/1.73 m <sup>2</sup> )                                                                                                          | GP: 313,646/<br>660,856                         | 5                      | -     | 12                          | 0.801                                           | Calibration plot                      | Discovery and validation cohort |
| Parrinello 2016 <sup>19</sup>         | T1D and T2D            | United States                                              | Cohort | Fine and Gray                | CKD (eGFR < 60 mL/min/1.73 m <sup>2</sup> and ≥ 25% decline in eGFR since visit 2, hospitalization due to kidney disease, RRT, or death from kidney disease) | 152/654                                         | 10                     | -     | 22                          | 0.716                                           | Well calibrated                       | Bootstrap                       |

Table S4. Continued

| Study                               | Development population                                             | Country                  | Design   | Type of model         | Outcome                                                                                                                                         | n events/ n total | Predicted time (years)          | Model                 | Number of predictors | Discrimination (AUC)                     | Calibration (Hosmer-Lemeshow p-value)                                              | Method of internal validation |
|-------------------------------------|--------------------------------------------------------------------|--------------------------|----------|-----------------------|-------------------------------------------------------------------------------------------------------------------------------------------------|-------------------|---------------------------------|-----------------------|----------------------|------------------------------------------|------------------------------------------------------------------------------------|-------------------------------|
| Riphagen 2015 <sup>20</sup>         | T2D                                                                | The Netherlands          | Cohort   | Cox and Fine and Gray | (Micro)albuminuria (UACR > 2.5 mg/mmol in men and > 3.5 mg/mmol in women)                                                                       | 183/640           | 10                              | -                     | 7                    | 0.69 (both standard and competing risk)  | Calibration plot = moderate (standard)<br>Calibration plot = good (competing risk) | N.R.                          |
| Riphagen 2015 <sup>20</sup>         | T2D                                                                | The Netherlands          | Cohort   | Cox and Fine and Gray | Progressive renal function loss (60% increase of baseline SCr)                                                                                  | 79/1,143          | 10                              | -                     | 5                    | 0.73 (standard)<br>0.74 (competing risk) | Calibration plot. Standard: over-estimation; competing risk: good                  | N.R.                          |
| Rodriguez-Romero 2019 <sup>21</sup> | T2D                                                                | United States and Canada | RCT      | Random Forest         | Nephropathy (doubling of baseline SCr, >20 mL/minute/1.73-m <sup>2</sup> decline in eGFR, UACR ≥ 30 mg/g, RRT or a rise of SCr > 291.72 μmol/L) | 6,777/10,251      | 7                               | -                     | 18                   | 0.768-0.840                              | N.R.                                                                               | Cross-validation              |
| Sun 2020 <sup>22</sup>              | T2D                                                                | China                    | Cohort   | Logistic              | ESRD (renal death, hospitalization due to non-fatal renal failure, or eGFR < 15 mL/min/1.73 m <sup>2</sup> )                                    | 225/968           | 3                               | Clinical              | 4                    | 0.86                                     | 0.558                                                                              | Random split sample           |
| Sun 2020 <sup>22</sup>              | T2D                                                                | China                    | Cohort   | Logistic              | ESRD (renal death, hospitalization due to non-fatal renal failure, or eGFR < 15 mL/min/1.73 m <sup>2</sup> )                                    | 225/968           | 3                               | Clinical-pathological | 5                    | 0.87                                     | 0.909                                                                              | Random split sample           |
| Sun 2020 <sup>22</sup>              | T2D                                                                | China                    | Cohort   | Logistic              | ESRD (renal death, hospitalization due to non-fatal renal failure, or eGFR < 15 mL/min/1.73 m <sup>2</sup> )                                    | 225/968           | 3                               | Clinical-medical      | 5                    | 0.84                                     | 0.418                                                                              | Random split sample           |
| Sun 2020 <sup>22</sup>              | T2D                                                                | China                    | Cohort   | Logistic              | ESRD (renal death, hospitalization due to non-fatal renal failure, or eGFR < 15 mL/min/1.73 m <sup>2</sup> )                                    | 225/968           | 3                               | Full model            | 7                    | 0.87                                     | 0.623                                                                              | Random split sample           |
| Tanaka 2013 <sup>23</sup>           | T2D                                                                | Japan                    | RCT      | Cox                   | Nephropathy (spot urinary albumin excretion > 33.9 mg/mmol creatinine)                                                                          | 71/1,748          | 5                               | -                     | 5                    | 0.77                                     | 0.11                                                                               | Cross-validation              |
| Wada 2014 <sup>24</sup>             | T2D                                                                | Japan                    | Cohort   | Cox                   | Renal event (RRT or half reduction in eGFR)                                                                                                     | 419/4,328         | N.R.                            | -                     | 5                    | N.R.                                     | Calibration table                                                                  | N.R.                          |
| Wan 2017 <sup>25</sup>              | T2D                                                                | China                    | Cohort   | Cox                   | ESRD (ICD-9: 250.3x, 585.x and 586.x or eGFR <15 mL/min/1.73m <sup>2</sup> )                                                                    | 239/116,509       | 5                               | Male<br>Female        | 7                    | 0.87<br>0.86                             | Calibration plot                                                                   | Random split sample           |
| Woodward 2016 <sup>26</sup>         | T2D and at least 1 risk factor for micro- or macrovascular disease | 20 countries             | RCT      | Cox                   | Major renal event (renal death or RRT)                                                                                                          | 84/7,301          | 10                              | -                     | 13                   | 0.81                                     | 0.13                                                                               | N.R.                          |
| Wysham 2020 <sup>27</sup>           | T2D                                                                | United States            | Registry | Logistic              | Moderate to severe DKD (>2 measurements < 60 mL/min/1.73 m <sup>2</sup> or CKD stage 3/4)                                                       | 6,219/160,031     | 6-months windows (0->60 months) | -                     | 13                   | 0.71                                     | Calibration plot =good                                                             | Random split sample           |

**Table S4** Continued

| Study                     | Development population | Country       | Design   | Type of model | Outcome                                                                                                           | n events/ n total | Predicted time (years) | Model | Number of predictors | Discrimination (AUC) | Calibration (Hosmer-Lemeshow p-value) | Method of internal validation |
|---------------------------|------------------------|---------------|----------|---------------|-------------------------------------------------------------------------------------------------------------------|-------------------|------------------------|-------|----------------------|----------------------|---------------------------------------|-------------------------------|
| Wysham 2020 <sup>27</sup> | T2D                    | United States | Registry | Logistic      | ESRD (CKD stage 5, ESRD medical claim, RRT)                                                                       | 1,619/ 160,031    |                        | -     | 12                   | 0.82                 |                                       | Random split sample           |
| Wysham 2020 <sup>27</sup> | T2D                    | United States | Registry | Logistic      | Renal death (Death <30 days after CKD diagnosis)                                                                  | 2,135 / 160,031   |                        | -     | 17                   | 0.85                 |                                       | Random split sample           |
| Yang 2006 <sup>28</sup>   | T2D                    | China         | Registry | Cox           | ESRD (renal death, hospitalization due to non-fatal renal failure, or MDRD eGFR < 15 mL/min/1.73 m <sup>2</sup> ) | 159/4,438         | 4                      | -     | 8                    | 0.97                 | > 0.10                                | Random split sample           |

\* The study of Base et al. uses the Greenwood-D'Agostino-Nam test instead of the Hosmer-L











**Table S6.** Characteristics of prediction models for the risk of nephropathy developed in the general population

| Study                            | Development population | Country                  | Design   | Type of model | Outcome                                                                                                       | n events/ n total | Predicted time (years) | Model            | Number of predictors | Discrimination (AUC)                                       | Calibration (Hosmer-Lemeshow p-value)                      | Method of internal validation |
|----------------------------------|------------------------|--------------------------|----------|---------------|---------------------------------------------------------------------------------------------------------------|-------------------|------------------------|------------------|----------------------|------------------------------------------------------------|------------------------------------------------------------|-------------------------------|
| Chien 2010 <sup>31</sup>         | GP                     | Taiwan                   | Cohort   | Cox           | CKD stage 3 (MDRD eGFR < 60 mL/min/1.73 m <sup>2</sup> )                                                      | 190/5,168         | 4                      | Clinical         | 5                    | 0.77 (point-based model)<br>0.78 (coefficient-based model) | 0.21 (point-based model)<br>0.01 (coefficient-based model) | Cross-validation              |
| Chang 2019 <sup>32</sup>         | GP with CKD stage 1-5  | Taiwan                   | Cohort   | Cox           | Initiation of dialysis                                                                                        | 1,017/1,549       | 1.8                    | -                | 4                    | N.R.                                                       | N.R.                                                       | N.R.                          |
| Hanratty 2010 <sup>33</sup>      | GP with hypertension   | United States            | Registry | Logistic      | CKD (MDRD eGFR < 60 mL/min/1.73 m <sup>2</sup> )                                                              | 429/10,420        | N.R.                   | -                | 5                    | 0.81                                                       | 0.01                                                       | N.R.                          |
| Hemmelgarn 2007 <sup>34</sup>    | GP                     | Canada                   | Registry | Logistic      | Rapid progression of kidney dysfunction (> 25% decline in MDRD eGFR)                                          | 1,216/10,184      | 2                      | -                | 5                    | 0.59                                                       | HL goodness of fit X <sup>2</sup> = 0.77                   | Random split sample           |
| Hippisley-Cox 2010 <sup>35</sup> | GP                     | England and Wales        | Registry | Cox           | Moderate/severe CKD (RRT, diagnosis of nephropathy, MDRD eGFR < 45 mL/min/1.73 m <sup>2</sup> or proteinuria) | 23,786/775,091    | 5                      | CKD model women  | 14                   | 0.88                                                       | N.R.                                                       | Random split sample           |
|                                  |                        |                          |          |               |                                                                                                               | 17,333/799,658    |                        | CKD model men    | 12                   | 0.88                                                       |                                                            |                               |
| Hippisley-Cox 2010 <sup>35</sup> | GP                     | England and Wales        | Registry | Cox           | ESRD (RRT or MDRD eGFR < 15 mL/min/1.73 m <sup>2</sup> )                                                      | 1,266/775,091     | 5                      | ESRD model women | 13                   | 0.84                                                       | N.R.                                                       | Random split sample           |
|                                  |                        |                          |          |               |                                                                                                               | 1,543/799,658     |                        | ESRD model men   | 11                   | 0.85                                                       |                                                            |                               |
| Johnson 2008 <sup>36</sup>       | GP with CKD stage 3-4  | United States and Canada | Registry | Cox           | RRT                                                                                                           | 323/9,782         | 5                      | -                | 6                    | 0.89                                                       | 0.99                                                       | Bootstrap                     |

Table S6. Continued

| Study                         | Development population | Country                  | Design   | Type of model | Outcome                                                            | n events/ n total | Predicted time (years) | Model                          | Number of predictors | Discrimination (AUC)       | Calibration (Hosmer-Lemeshow p-value) | Method of internal validation   |
|-------------------------------|------------------------|--------------------------|----------|---------------|--------------------------------------------------------------------|-------------------|------------------------|--------------------------------|----------------------|----------------------------|---------------------------------------|---------------------------------|
| Kshirsagar 2008 <sup>37</sup> | GP                     | United States            | Cohort   | Logistic      | CKD (MDRD eGFR < 60 mL/min/1.73 m <sup>2</sup> )                   | 1,605/14,155      | < 10                   | Best-fitting categorical model | 10                   | 0.70                       | > 0.20                                | Random split sample             |
|                               |                        |                          |          |               |                                                                    |                   |                        | Simplified categorical model   | 8                    | 0.69                       |                                       |                                 |
| O'Seaghdha 2012 <sup>38</sup> | GP                     | United States            | Cohort   | Logistic      | CKD (MDRD eGFR < 60 mL/min/1.73 m <sup>2</sup> )                   | 229/2,490         | 10                     | -                              | 5                    | 0.79                       | 0.60                                  | Bootstrap                       |
| Saranburut 2017 <sup>39</sup> | GP                     | Thailand                 | Cohort   | Logistic      | CKD (CKD-EPI eGFR < 60 mL/min/1.73 m <sup>2</sup> )                | 271/3,186         | 10                     | Clinical                       | 5                    | 0.72                       | 0.35                                  | Discovery and validation cohort |
| Saranburut 2017 <sup>39</sup> | GP                     | Thailand                 | Cohort   | Logistic      | CKD (CKD-EPI eGFR < 60 mL/min/1.73 m <sup>2</sup> )                | 271/3,186         | 10                     | Clinical+ Limited laboratory   | 6                    | 0.79                       | 0.21                                  | Discovery and validation cohort |
| Saranburut 2017 <sup>39</sup> | GP                     | Thailand                 | Cohort   | Logistic      | CKD (CKD-EPI eGFR < 60 mL/min/1.73 m <sup>2</sup> )                | 271/3,186         | 10                     | Clinical+ Full laboratory      | 9                    | 0.80                       | 0.41                                  | Discovery and validation cohort |
| Schroeder 2017 <sup>40</sup>  | GP with CKD stage 3-4  | United States and Canada | Registry | Cox           | RRT                                                                | 737/22,460        | 5                      | -                              | 8                    | 0.96                       | High calibration                      | Bootstrap                       |
| Umesawa 2018 <sup>41</sup>    | GP                     | Japan                    | Cohort   | Logistic      | CKD (eGFR < 60 mL/min/1.73m <sup>2</sup> and/or proteinuria 2+/3+) | 16,464/135,007    | 10                     | Simple risk model              | 4                    | Men: 0.827<br>Women: 0.814 | Calibration plot                      | External set                    |
| Umesawa 2018 <sup>41</sup>    | GP                     | Japan                    | Cohort   | Logistic      | CKD (eGFR < 60 mL/min/1.73m <sup>2</sup> and/or proteinuria 2+/3+) | 16,464/135,007    | 10                     | Full risk model                | 11                   | Men: 0.823<br>Women: 0.824 | Calibration plot                      | External set                    |
| Wen 2020 <sup>42</sup>        | GP                     | China                    | Cohort   | Logistic      | CKD (eGFR < 60 mL/min/1.73m <sup>2</sup> or UACR ≥30 mg/g)         | 590/3,266         | 5.6                    | Simple risk model              | 5                    | 0.717                      | 0.769                                 | Random split sample             |
| Wen 2020 <sup>42</sup>        | GP                     | China                    | Cohort   | Logistic      | CKD (eGFR < 60 mL/min/1.73m <sup>2</sup> or UACR ≥30 mg/g)         | 590/3,266         | 5.6                    | Best-fit risk score            | 7                    | 0.721                      | 0.961                                 | Random split sample             |







**Table S8. Reasons for excluding studies in people with type 2 diabetes for external validation.**

| <b>Study</b>                                  | <b>Exclusion reason</b>                                                                                                       |
|-----------------------------------------------|-------------------------------------------------------------------------------------------------------------------------------|
| Altemtam et al. 2011 <sup>43</sup>            | The model contains variables that are not available in DCS including uric acid levels                                         |
| Basu et al. 2017 <sup>3</sup>                 | The frequency of cases in the renal failure outcome was too low to perform external validation                                |
| Cheng et al. 2020 <sup>4</sup>                | The frequency of cases was too low to perform external validation                                                             |
| Clarke et al. 2004 <sup>44</sup>              | The algorithm for retinopathy is part of larger simulation model, and could not be applied to the Diabetes Care System cohort |
| Elley et al. 2013 <sup>45</sup>               | The frequency of cases was too low to perform external validation                                                             |
| Fernandez-Fernandez et al. 2020 <sup>29</sup> | Multiple variables that are not available in DCS, including FE phosphate and uric acid                                        |
| Goldfarb-Rumyantzev et al. 2002 <sup>9</sup>  | The model contains variables that are not available in DCS including IgG/Cr ratio                                             |
| Hu et al. 2020 <sup>10</sup>                  | The model contains variables that are not available in DCS including blood urea nitrogen                                      |
| Imbroll et al. 2017 <sup>11</sup>             | The model contains variables that are not available in DCS including white cell count                                         |
| Jardine et al. 2012 <sup>46</sup>             | The frequency of cases in the major kidney-related events outcome was too low to perform external validation                  |
| Keane et al. 2006 <sup>47</sup>               | The frequency of ESRD cases was too low in DCS to perform external validation                                                 |
| Li et al. 2016 <sup>14</sup>                  | The frequency of ESRD cases was too low in DCS to perform external validation                                                 |
| Lin et al. 2017 <sup>15</sup>                 | The frequency of ESRD cases was too low in DCS to perform external validation                                                 |
| Parrinello et al. 2016 <sup>19</sup>          | The model contains variables that are not available in DCS including alcohol consumption and physical activity                |
| Riphagen et al. 2015 <sup>20</sup>            | The frequency of progressive renal function loss outcome was too low in DCS to perform external validation                    |
| Rodriguez-Romero et al. 2019 <sup>21</sup>    | The models contain variables that are not available in DCS                                                                    |
| Sun et al. 2020 <sup>22</sup>                 | The frequency of ESRD cases was too low in DCS to perform external validation                                                 |
| Tanaka et al. 2013 <sup>23</sup>              | The models contain variables that are not available in DCS                                                                    |
| Wada et al. 2014 <sup>24</sup>                | The frequency of ESRD cases was too low in DCS to perform external validation                                                 |
| Wan et al. 2017 <sup>25</sup>                 | The frequency of ESRD cases was too low in DCS to perform external validation                                                 |
| Woodward et al. 2016 <sup>26</sup>            | The frequency of ESRD cases was too low in DCS to perform external validation                                                 |
| Wysham et al. 2020 <sup>27</sup>              | The models contain variables that are not available in DCS                                                                    |
| Yang et al. 2006 <sup>28</sup>                | The frequency of ESRD cases was too low in DCS to perform external validation                                                 |

**Table S9 Reasons for excluding studies in the general population for external validation.**

| <b>Study</b>                            | <b>Exclusion reason</b>                                                                                                                                    |
|-----------------------------------------|------------------------------------------------------------------------------------------------------------------------------------------------------------|
| Chang et al. 2019 <sup>32</sup>         | The frequency of cases was too low in DCS to perform external validation                                                                                   |
| Hemmelgarn et al. 2007 <sup>48</sup>    | The models contain variables that are not available in DCS                                                                                                 |
| Hippisley-Cox et al. 2010 <sup>49</sup> | The frequency of ESRD cases was too low in DCS to perform external validation                                                                              |
| Johnson et al. 2008 <sup>50</sup>       | The frequency of RRT cases was too low in DCS to perform external validation                                                                               |
| Kshirsagar et al. 2008 <sup>51</sup>    | The models contain variables that are not available in DCS                                                                                                 |
| Saranburut et al. 2017 <sup>39</sup>    | One of the three models could not be validated because uric acid was not available in DCS                                                                  |
| Schroeder et al. 2017 <sup>52</sup>     | The frequency of RRT cases was too low in DCS to perform external validation                                                                               |
| Umesawa et al. 2018 <sup>41</sup>       | The models contain variables that are not available in DCS                                                                                                 |
| Wen et al. 2020 <sup>42</sup>           | Only one of the two models could be validated. The best fit model contain variables that are not available in DCS, the simple clinical model was valdiated |

**Table S10 Number of cases and controls used in the external validation in DCS.**

| Author                                | Type     | Horizon | N <sub>total</sub> | N <sub>event</sub> | Definition                                                                                                                                | Group       |
|---------------------------------------|----------|---------|--------------------|--------------------|-------------------------------------------------------------------------------------------------------------------------------------------|-------------|
| <b>Type 2 diabetes</b>                |          |         |                    |                    |                                                                                                                                           |             |
| Afghahi <sup>1</sup>                  | Logistic | 2       | 9015               | 1474               | UACR 20-200 µg/min or UACR > 200 µg/min                                                                                                   | Albuminuria |
|                                       | Logistic | 5       | 6649               | 1413               |                                                                                                                                           |             |
|                                       | Logistic | 10      | 2977               | 827                |                                                                                                                                           |             |
| Basu (Micro) <sup>3</sup>             | Cox      | 2       | 10063              | 1691               | UACR ≥ 300mg/g                                                                                                                            | Albuminuria |
|                                       | Cox      | 5       | 7126               | 1760               |                                                                                                                                           |             |
|                                       | Cox      | 10      | 3106               | 1119               |                                                                                                                                           |             |
| Basu (Macro) <sup>3</sup>             | Cox      | 2       | 10063              | 263                | UACR ≥ 300mg/g                                                                                                                            | Albuminuria |
|                                       | Cox      | 5       | 7126               | 267                |                                                                                                                                           |             |
|                                       | Cox      | 10      | 3106               | 173                |                                                                                                                                           |             |
| Jardine <sup>12</sup>                 | Cox      | 2       | 8204               | 221                | UACR at baseline ≤30 ug/mg<br>UACR ≥ 30ug/mg                                                                                              | Albuminuria |
|                                       | Cox      | 5       | 6108               | 440                |                                                                                                                                           |             |
|                                       | Cox      | 10      | 2754               | 421                |                                                                                                                                           |             |
| Riphagen <sup>20</sup>                | Cox      | 2       | 8799               | 395                | UACR > 2.5 mg/mmol in men and > 3.5 mg/mmol in women                                                                                      | Albuminuria |
|                                       | Cox      | 5       | 6362               | 749                |                                                                                                                                           |             |
|                                       | Cox      | 10      | 2796               | 627                |                                                                                                                                           |             |
| Afghahi (eCrCl) <sup>1</sup>          | Logistic | 2       | 9411               | 1765               | eCrCl < 60 mL/min                                                                                                                         | DKD         |
|                                       | Logistic | 5       | 6840               | 1657               |                                                                                                                                           |             |
|                                       | Logistic | 10      | 3022               | 925                |                                                                                                                                           |             |
|                                       | Logistic | GoDARTS | 7403               | 1827               |                                                                                                                                           |             |
| Afghahi (MDRD) <sup>1</sup>           | Logistic | 2       | 9603               | 2159               | MDRD < 60 mL/min/1.73m <sup>2</sup>                                                                                                       | DKD         |
|                                       | Logistic | 5       | 6912               | 2036               |                                                                                                                                           |             |
|                                       | Logistic | 10      | 3034               | 1205               |                                                                                                                                           |             |
|                                       | Logistic | GoDARTS | 7403               | 2883               |                                                                                                                                           |             |
| Basu (Composite 1) <sup>3</sup>       | Cox      | 2       | 10063              | 614                | Doubling serum creatinine or >20 mL/min/1.73m <sup>2</sup> decrease in eGFR                                                               | DKD         |
|                                       | Cox      | 5       | 7126               | 1068               |                                                                                                                                           |             |
|                                       | Cox      | 10      | 3106               | 721                |                                                                                                                                           |             |
| Basu (Composite 2) <sup>3</sup>       | Cox      | 2       | 10063              | 861                | Macro-albuminuria, renal failure, end stage renal disease, doubling of serum creatinine or >20 mL/min/1.73m <sup>2</sup> decrease in eGFR | DKD         |
|                                       | Cox      | 5       | 7126               | 1262               |                                                                                                                                           |             |
|                                       | Cox      | 10      | 3106               | 825                |                                                                                                                                           |             |
| Basu (Composite 3) <sup>3</sup>       | Cox      | 2       | 10063              | 1693               | Macroalbuminuria, microalbuminuria, renal failure, or end-stage renal disease                                                             | DKD         |
|                                       | Cox      | 5       | 7126               | 1761               |                                                                                                                                           |             |
|                                       | Cox      | 10      | 3106               | 1120               |                                                                                                                                           |             |
| Dunkler (Clinical) <sup>7</sup>       | Logistic | 2       | 9858               | 1676               | UACR > 30 mg/g and 300 mg/g, doubling creatinine, CKD-EPI eGFR < 15 mL/min/1.73 m <sup>2</sup>                                            | DKD         |
|                                       | Logistic | 5       | 7061               | 1779               |                                                                                                                                           |             |
|                                       | Logistic | 10      | 3088               | 1141               |                                                                                                                                           |             |
| Dunkler (Laboratory) <sup>7</sup>     | Logistic | 2       | 9858               | 1676               | UACR > 30 mg/g and 300 mg/g, doubling creatinine, CKD-EPI eGFR < 15 mL/min/1.73 m <sup>2</sup>                                            | DKD         |
|                                       | Logistic | 5       | 7061               | 1779               |                                                                                                                                           |             |
|                                       | Logistic | 10      | 3088               | 1141               |                                                                                                                                           |             |
| Low <sup>16</sup>                     | Logistic | 2       | 9888               | 278                | MDRD eGFR category coupled with ≥ 25% reduction in eGFR from baseline                                                                     | DKD         |
|                                       | Logistic | 5       | 6980               | 705                |                                                                                                                                           |             |
|                                       | Logistic | 10      | 3054               | 613                |                                                                                                                                           |             |
| Nelson <sup>18</sup>                  | Cox      | 2       | 8577               | 810                | CKD-EPI eGFR > 60 mL/min/1.73 m <sup>2</sup> at baseline<br>CKD-EPI eGFR < 60 mL/min/1.73 m <sup>2</sup>                                  | DKD         |
|                                       | Cox      | 5       | 6294               | 1098               |                                                                                                                                           |             |
|                                       | Cox      | 10      | 2810               | 802                |                                                                                                                                           |             |
| Dagliati <sup>6</sup>                 | Logistic | 2       | 9879               | 3871               | eGFR<60 mL/min/1.73m <sup>2</sup> or UACR≥30 mg/g                                                                                         | DKD         |
|                                       | Logistic | 5       | 6978               | 3342               |                                                                                                                                           |             |
|                                       | Logistic | 10      | 3054               | 1761               |                                                                                                                                           |             |
| <b>General population</b>             |          |         |                    |                    |                                                                                                                                           |             |
| Saranburut (Clinical) <sup>39</sup>   | Logistic | 2       | 8577               | 810                | CKD-EPI eGFR < 60 mL/min/1.73 m <sup>2</sup>                                                                                              | CKD         |
|                                       | Logistic | 5       | 6294               | 1098               |                                                                                                                                           |             |
|                                       | Logistic | 10      | 2810               | 802                |                                                                                                                                           |             |
| Saranburut (Laboratory) <sup>39</sup> | Logistic | 2       | 8577               | 810                | CKD-EPI eGFR < 60 mL/min/1.73 m <sup>2</sup>                                                                                              | CKD         |
|                                       | Logistic | 5       | 6294               | 1098               |                                                                                                                                           |             |
|                                       | Logistic | 10      | 2810               | 802                |                                                                                                                                           |             |
|                                       | Logistic | GoDARTS | 8552               | 3199               |                                                                                                                                           |             |
| Hanratty <sup>33</sup>                | Cox      | 2       | 9603               | 2159               | MDRD eGFR < 60 mL/min/1.73 m <sup>2</sup>                                                                                                 | CKD         |
|                                       | Cox      | 5       | 6912               | 2036               |                                                                                                                                           |             |
|                                       | Cox      | 10      | 3034               | 1205               |                                                                                                                                           |             |
|                                       | Cox      | GoDARTS | 8607               | 3210               |                                                                                                                                           |             |
| O'Seaghdha <sup>38</sup>              | Cox      | 2       | 9603               | 2159               | MDRD eGFR < 60 mL/min/1.73 m <sup>2</sup>                                                                                                 | CKD         |
|                                       | Cox      | 5       | 6912               | 2036               |                                                                                                                                           |             |
|                                       | Cox      | 10      | 3034               | 1205               |                                                                                                                                           |             |
|                                       | Cox      | GoDARTS | 5322               | 2883               |                                                                                                                                           |             |
| Wen <sup>42</sup>                     | Logistic | 2       | 8577               | 810                | eGFR < 60 mL/min/1.73m <sup>2</sup> or<br>UACR ≥30 mg/g                                                                                   | CKD         |
|                                       | Logistic | 5       | 6294               | 1098               |                                                                                                                                           |             |
|                                       | Logistic | 10      | 2810               | 802                |                                                                                                                                           |             |
| Chien <sup>31</sup>                   | Cox      | 2       | 9603               | 2159               | MDRD eGFR < 60 mL/min/1.73 m <sup>2</sup>                                                                                                 | CKD         |
|                                       | Cox      | 5       | 6912               | 2036               |                                                                                                                                           |             |
|                                       | Cox      | 10      | 3034               | 1205               |                                                                                                                                           |             |

In Basu et al composite outcomes were used. Composite 1, doubling serum creatinine or >20 mL/min/1.73m<sup>2</sup> decrease in eGFR; composite 2, macro-albuminuria, renal failure, end stage renal disease, doubling of serum creatinine or >20 mL/min/1.73m<sup>2</sup> decrease in eGFR; Composite 3, Macroalbuminuria, microalbuminuria, renal failure, or end-stage renal disease. CKD, chronic kidney disease; ESRD, end-stage renal disease.

**Table S11 Comparison of discovery and external validation**

| Discovery                | Model      | Population | Horizon | Outcome | C <sub>Disc</sub> | C <sub>Val</sub> | C <sub>DCS</sub><br>(2Y) | C <sub>DCS</sub><br>(5Y) | C <sub>DCS</sub><br>(10Y) | Reporting study        |
|--------------------------|------------|------------|---------|---------|-------------------|------------------|--------------------------|--------------------------|---------------------------|------------------------|
| Nelson <sup>18</sup>     | Diabetes   | Diabetes   | 5       | DKD     | 0.81              | 0.81             | 0.87                     | 0.81                     | 0.76                      | Nelson <sup>18</sup>   |
| Dunkler <sup>7</sup>     | Laboratory | Diabetes   | 5       | DKD     | 0.68              | 0.68             | 0.65                     | 0.68                     | 0.69                      | Dunkler <sup>7</sup>   |
| Dunkler <sup>7</sup>     | Clinical   | Diabetes   | 5       | DKD     | 0.69              | 0.69             | 0.66                     | 0.70                     | 0.70                      | Dunkler <sup>7</sup>   |
|                          |            |            |         |         |                   |                  |                          |                          |                           |                        |
| O'Seaghdha <sup>38</sup> |            | Diabetes   | 5       | CKD     | 0.79              | 0.76             | 0.74                     | 0.76                     | 0.77                      | Nelson <sup>18</sup>   |
| O'Seaghdha <sup>38</sup> |            | GP         | 5       | CKD     | 0.79              | 0.91             | 0.74                     | 0.76                     | 0.77                      | Fraccaro <sup>53</sup> |
| Chien <sup>31</sup>      |            | Diabetes   | 5       | CKD     | 0.78              | 0.69             | 0.69                     | 0.66                     | 0.65                      | Nelson <sup>18</sup>   |
| Chien <sup>31</sup>      |            | GP         | 5       | CKD     | 0.78              | 0.90             | 0.69                     | 0.66                     | 0.65                      | Fraccaro <sup>53</sup> |

C<sub>Disc</sub>, C-statistic observed in the development study; C<sub>Val</sub>, C-statistic observed in the validation study, C<sub>DCS</sub>, C-statistic observed in the current study.

**Table S12 Best performing models across outcomes and horizons**

| <b>Outcome</b>          | <b>2-year horizon</b>                              | <b>5-year horizon</b>                              | <b>10-year horizon</b>                             |
|-------------------------|----------------------------------------------------|----------------------------------------------------|----------------------------------------------------|
| <b>Macroalbuminuria</b> | Basu <sup>1</sup>                                  | Basu <sup>1</sup>                                  | Basu <sup>1</sup>                                  |
| <b>DKD</b>              | Afghahi <sup>1</sup>                               | Afghahi <sup>1</sup>                               | Afghahi <sup>1</sup>                               |
| <b>CKD*</b>             | Saranburut <sup>39</sup><br>Hanratty <sup>33</sup> | Saranburut <sup>39</sup><br>Hanratty <sup>33</sup> | Saranburut <sup>39</sup><br>Hanratty <sup>33</sup> |

\* The model of Saranburut showed better calibration, while the model of Hanratty showed better discrimination.

## References

- 1 Afghahi, H. *et al.* Risk factors for the development of albuminuria and renal impairment in type 2 diabetes--the Swedish National Diabetes Register (NDR). *Nephrol Dial Transplant* **26**, 1236-1243, doi:10.1093/ndt/gfq535 (2011).
- 2 Altemtam, N., Russell, J. & El Nahas, M. A study of the natural history of diabetic kidney disease (DKD). *Nephrol Dial Transplant* **27**, 1847-1854, doi:10.1093/ndt/gfr561 (2012).
- 3 Basu, S., Sussman, J. B., Berkowitz, S. A., Hayward, R. A. & Yudkin, J. S. Development and validation of Risk Equations for Complications Of type 2 Diabetes (RECODe) using individual participant data from randomised trials. *Lancet Diabetes Endocrinol* **5**, 788-798, doi:10.1016/s2213-8587(17)30221-8 (2017).
- 4 Cheng, Y., Shang, J., Liu, D., Xiao, J. & Zhao, Z. Development and validation of a predictive model for the progression of diabetic kidney disease to kidney failure. *Ren Fail* **42**, 550-559, doi:10.1080/0886022x.2020.1772294 (2020).
- 5 Clarke, P. M. *et al.* A model to estimate the lifetime health outcomes of patients with type 2 diabetes: the United Kingdom Prospective Diabetes Study (UKPDS) Outcomes Model (UKPDS no. 68). *Diabetologia* **47**, 1747-1759, doi:10.1007/s00125-004-1527-z (2004).
- 6 Dagliati, A. *et al.* Machine Learning Methods to Predict Diabetes Complications. *J Diabetes Sci Technol* **12**, 295-302, doi:10.1177/1932296817706375 (2018).
- 7 Dunkler, D. *et al.* Risk Prediction for Early CKD in Type 2 Diabetes. *Clin J Am Soc Nephrol* **10**, 1371-1379, doi:10.2215/CJN.10321014 (2015).
- 8 Elley, C. R. *et al.* Derivation and validation of a renal risk score for people with type 2 diabetes. *Diabetes Care* **36**, 3113-3120, doi:10.2337/dc13-0190 (2013).
- 9 Goldfarb-Rumyantzev, A. S. & Pappas, L. Prediction of renal insufficiency in Pima Indians with nephropathy of type 2 diabetes mellitus. *Am J Kidney Dis* **40**, 252-264, doi:10.1053/ajkd.2002.34503 (2002).
- 10 Hu, Y., Shi, R., Mo, R. & Hu, F. Nomogram for the prediction of diabetic nephropathy risk among patients with type 2 diabetes mellitus based on a questionnaire and biochemical indicators: a retrospective study. *Aging (Albany NY)* **12**, 10317-10336, doi:10.18632/aging.103259 (2020).
- 11 Giordano Imbroll, M., Agius Loretta, D., Tabone, T. & Fava, S. Predictors and generation of risk equations for albuminuria progression in type 2 diabetes. *Clin Nephrol* **88**, 33-39, doi:10.5414/cn109010 (2017).
- 12 Jardine, M. J. *et al.* Prediction of kidney-related outcomes in patients with type 2 diabetes. *Am J Kidney Dis* **60**, 770-778, doi:10.1053/j.ajkd.2012.04.025 (2012).
- 13 Keane, W. F. *et al.* Risk scores for predicting outcomes in patients with type 2 diabetes and nephropathy: the RENAAL study. *Clin J Am Soc Nephrol* **1**, 761-767, doi:10.2215/CJN.01381005 (2006).
- 14 Li, H. Y. *et al.* Serum Vascular Adhesion Protein-1 Predicts End-Stage Renal Disease in Patients with Type 2 Diabetes. *PLoS One* **11**, e0147981, doi:10.1371/journal.pone.0147981 (2016).
- 15 Lin, C. C. *et al.* Development and validation of a risk prediction model for end-stage renal disease in patients with type 2 diabetes. *Sci Rep* **7**, 10177, doi:10.1038/s41598-017-09243-9 (2017).
- 16 Low, S. *et al.* Development and validation of a predictive model for Chronic Kidney Disease progression in Type 2 Diabetes Mellitus based on a 13-year study in Singapore. *Diabetes Res Clin Pract* **123**, 49-54, doi:10.1016/j.diabres.2016.11.008 (2017).
- 17 Miao, D. D. *et al.* Development and Validation of a Model for Predicting Diabetic Nephropathy in Chinese People. *Biomed Environ Sci* **30**, 106-112, doi:10.3967/bes2017.014 (2017).
- 18 Nelson, R. G. *et al.* Development of Risk Prediction Equations for Incident Chronic Kidney Disease. *Jama* **322**, 2104-2114, doi:10.1001/jama.2019.17379 (2019).
- 19 Parrinello, C. M. *et al.* Risk prediction of major complications in individuals with diabetes: the Atherosclerosis Risk in Communities Study. *Diabetes Obes Metab* **18**, 899-906, doi:10.1111/dom.12686 (2016).
- 20 Riphagen, I. J. *et al.* Comparison of methods for renal risk prediction in patients with type 2 diabetes (ZODIAC-36). *PLoS One* **10**, e0120477, doi:10.1371/journal.pone.0120477 (2015).
- 21 Rodriguez-Romero, V. *et al.* Prediction of Nephropathy in Type 2 Diabetes: An Analysis of the ACCORD Trial Applying Machine Learning Techniques. *Clin Transl Sci* **12**, 519-528, doi:10.1111/cts.12647 (2019).

- 22 Sun, L., Shang, J., Xiao, J. & Zhao, Z. Development and validation of a predictive model for end-stage renal disease risk in patients with diabetic nephropathy confirmed by renal biopsy. *PeerJ* **8**, e8499, doi:10.7717/peerj.8499 (2020).
- 23 Tanaka, S. *et al.* Predicting macro- and microvascular complications in type 2 diabetes: the Japan Diabetes Complications Study/the Japanese Elderly Diabetes Intervention Trial risk engine. *Diabetes Care* **36**, 1193-1199, doi:10.2337/dc12-0958 (2013).
- 24 Wada, T. *et al.* Clinical impact of albuminuria and glomerular filtration rate on renal and cardiovascular events, and all-cause mortality in Japanese patients with type 2 diabetes. *Clin Exp Nephrol* **18**, 613-620, doi:10.1007/s10157-013-0879-4 (2014).
- 25 Wan, E. Y. F. *et al.* Prediction of new onset of end stage renal disease in Chinese patients with type 2 diabetes mellitus - a population-based retrospective cohort study. *BMC Nephrol* **18**, 257, doi:10.1186/s12882-017-0671-x (2017).
- 26 Woodward, M. *et al.* Prediction of 10-year vascular risk in patients with diabetes: the AD-ON risk score. *Diabetes Obes Metab* **18**, 289-294, doi:10.1111/dom.12614 (2016).
- 27 Wysham, C. H. *et al.* Development of risk models for major adverse chronic renal outcomes among patients with type 2 diabetes mellitus using insurance claims: a retrospective observational study. *Curr Med Res Opin* **36**, 219-227, doi:10.1080/03007995.2019.1682981 (2020).
- 28 Yang, X. L. *et al.* End-stage renal disease risk equations for Hong Kong Chinese patients with type 2 diabetes: Hong Kong Diabetes Registry. *Diabetologia* **49**, 2299-2308, doi:10.1007/s00125-006-0376-3 (2006).
- 29 Fernandez-Fernandez, B. *et al.* Gender, Albuminuria and Chronic Kidney Disease Progression in Treated Diabetic Kidney Disease. *J Clin Med* **9**, doi:10.3390/jcm9061611 (2020).
- 30 Nelson, C. P. *et al.* Association analyses based on false discovery rate implicate new loci for coronary artery disease. *Nat Genet* **49**, 1385-1391, doi:10.1038/ng.3913 (2017).
- 31 Chien, K. L. *et al.* A prediction model for the risk of incident chronic kidney disease. *Am J Med* **123**, 836-846 e832, doi:10.1016/j.amjmed.2010.05.010 (2010).
- 32 Chang, H. L. *et al.* A predictive model for progression of CKD. *Medicine (Baltimore)* **98**, e16186, doi:10.1097/md.00000000000016186 (2019).
- 33 Hanratty, R. *et al.* Incident chronic kidney disease and the rate of kidney function decline in individuals with hypertension. *Nephrol Dial Transplant* **25**, 801-807, doi:10.1093/ndt/gfp534 (2010).
- 34 Hemmelgarn, B. R., Culeton, B. F. & Ghali, W. A. Derivation and validation of a clinical index for prediction of rapid progression of kidney dysfunction. *QJM* **100**, 87-92, doi:10.1093/qjmed/hcm001 (2007).
- 35 Hippisley-Cox, J. & Coupland, C. Predicting the risk of chronic Kidney Disease in men and women in England and Wales: prospective derivation and external validation of the QKidney Scores. *BMC Fam Pract* **11**, 49, doi:10.1186/1471-2296-11-49 (2010).
- 36 Johnson, E. S., Thorp, M. L., Platt, R. W. & Smith, D. H. Predicting the risk of dialysis and transplant among patients with CKD: a retrospective cohort study. *Am J Kidney Dis* **52**, 653-660, doi:10.1053/j.ajkd.2008.04.026 (2008).
- 37 Kshirsagar, A. V. *et al.* A simple algorithm to predict incident kidney disease. *Arch Intern Med* **168**, 2466-2473, doi:10.1001/archinte.168.22.2466 (2008).
- 38 O'Seaghdha, C. M. *et al.* A risk score for chronic kidney disease in the general population. *Am J Med* **125**, 270-277, doi:10.1016/j.amjmed.2011.09.009 (2012).
- 39 Saranburut, K. *et al.* Risk scores to predict decreased glomerular filtration rate at 10 years in an Asian general population. *BMC Nephrol* **18**, 240, doi:10.1186/s12882-017-0653-z (2017).
- 40 Schroeder, E. B. *et al.* Predicting 5-Year Risk of RRT in Stage 3 or 4 CKD: Development and External Validation. *Clin J Am Soc Nephrol* **12**, 87-94, doi:10.2215/CJN.01290216 (2017).
- 41 Umesawa, M. *et al.* Validity of a Risk Prediction Equation for CKD After 10 Years of Follow-up in a Japanese Population: The Ibaraki Prefectural Health Study. *Am J Kidney Dis* **71**, 842-850, doi:10.1053/j.ajkd.2017.09.013 (2018).
- 42 Wen, J. *et al.* Risk scores for predicting incident chronic kidney disease among rural Chinese people: a village-based cohort study. *BMC Nephrol* **21**, 120, doi:10.1186/s12882-020-01787-9 (2020).

- 43 Altemtam, N., Russell, J. & El Nahas, M. A study of the natural history of diabetic kidney disease (DKD). *Nephrology Dialysis Transplantation* **27**, 1847-1854 (2011).
- 44 Clarke, P. *et al.* A model to estimate the lifetime health outcomes of patients with type 2 diabetes: the United Kingdom Prospective Diabetes Study (UKPDS) Outcomes Model (UKPDS no. 68). *Diabetologia* **47**, 1747-1759 (2004).
- 45 Elley, C. R. *et al.* Derivation and validation of a renal risk score for people with type 2 diabetes. *Diabetes Care* **36**, 3113-3120 (2013).
- 46 Jardine, M. J. *et al.* Prediction of kidney-related outcomes in patients with type 2 diabetes. *American journal of kidney diseases* **60**, 770-778 (2012).
- 47 Keane, W. F. *et al.* Risk scores for predicting outcomes in patients with type 2 diabetes and nephropathy: the RENAAL study. *Clin J Am Soc Nephrol* **1**, 761-767, doi:10.2215/cjn.01381005 (2006).
- 48 Hemmelgarn, B. R., Culeton, B. F. & Ghali, W. A. Derivation and validation of a clinical index for prediction of rapid progression of kidney dysfunction. *QJM : monthly journal of the Association of Physicians* **100**, 87-92, doi:10.1093/qjmed/hcm001 (2007).
- 49 Hippisley-Cox, J. & Coupland, C. Predicting the risk of chronic Kidney Disease in men and women in England and Wales: prospective derivation and external validation of the QKidney Scores. *BMC family practice* **11**, 49-49, doi:10.1186/1471-2296-11-49 (2010).
- 50 Johnson, E. S., Thorp, M. L., Platt, R. W. & Smith, D. H. J. A. j. o. k. d. Predicting the risk of dialysis and transplant among patients with CKD: a retrospective cohort study. **52**, 653-660 (2008).
- 51 Kshirsagar, A. V. *et al.* A simple algorithm to predict incident kidney disease. **168**, 2466-2473 (2008).
- 52 Schroeder, E. B. *et al.* Predicting 5-year risk of RRT in stage 3 or 4 CKD: development and external validation. **12**, 87-94 (2017).
- 53 Fraccaro, P. *et al.* An external validation of models to predict the onset of chronic kidney disease using population-based electronic health records from Salford, UK. *BMC Med* **14**, 104, doi:10.1186/s12916-016-0650-2 (2016).
